# Supplementary material
Source: publisher figshare collection journal article supplement (https://frontiersin.figshare.com/ndownloader/files/25397699)

Supplementary Figure 1. The SNaPshot SNP assay group 1 (rs30187, rs26653, rs26618, rs2549782, rs2248374)

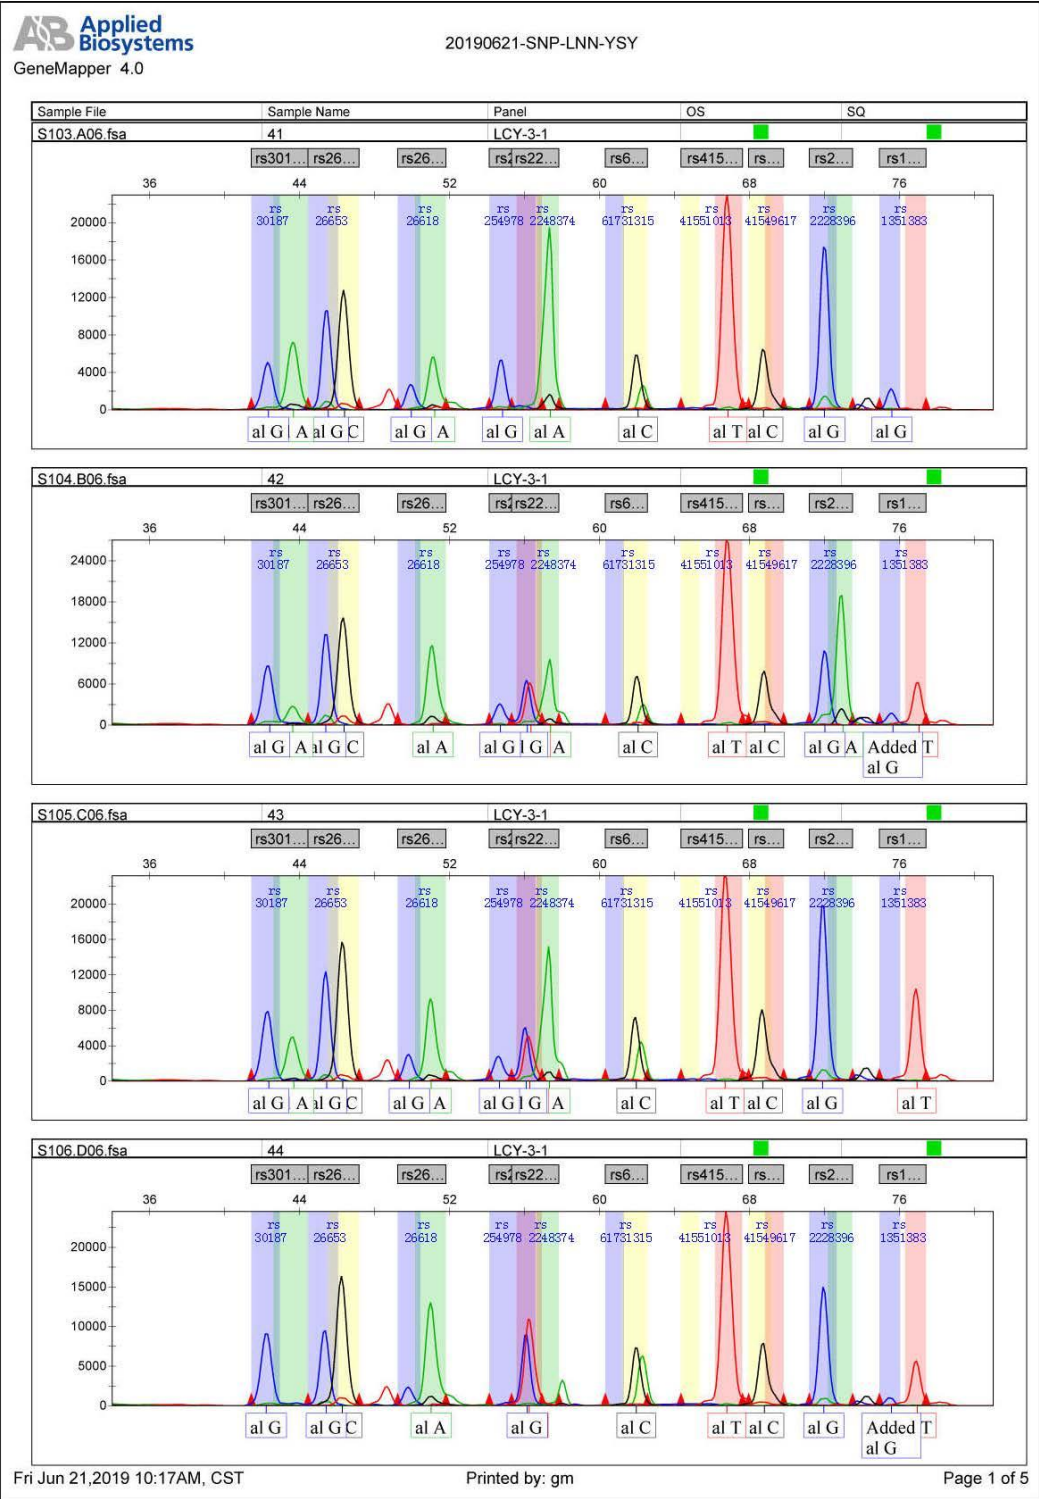

Supplementary Figure 2. The SNaPshot SNP assay group 2 (rs27044)

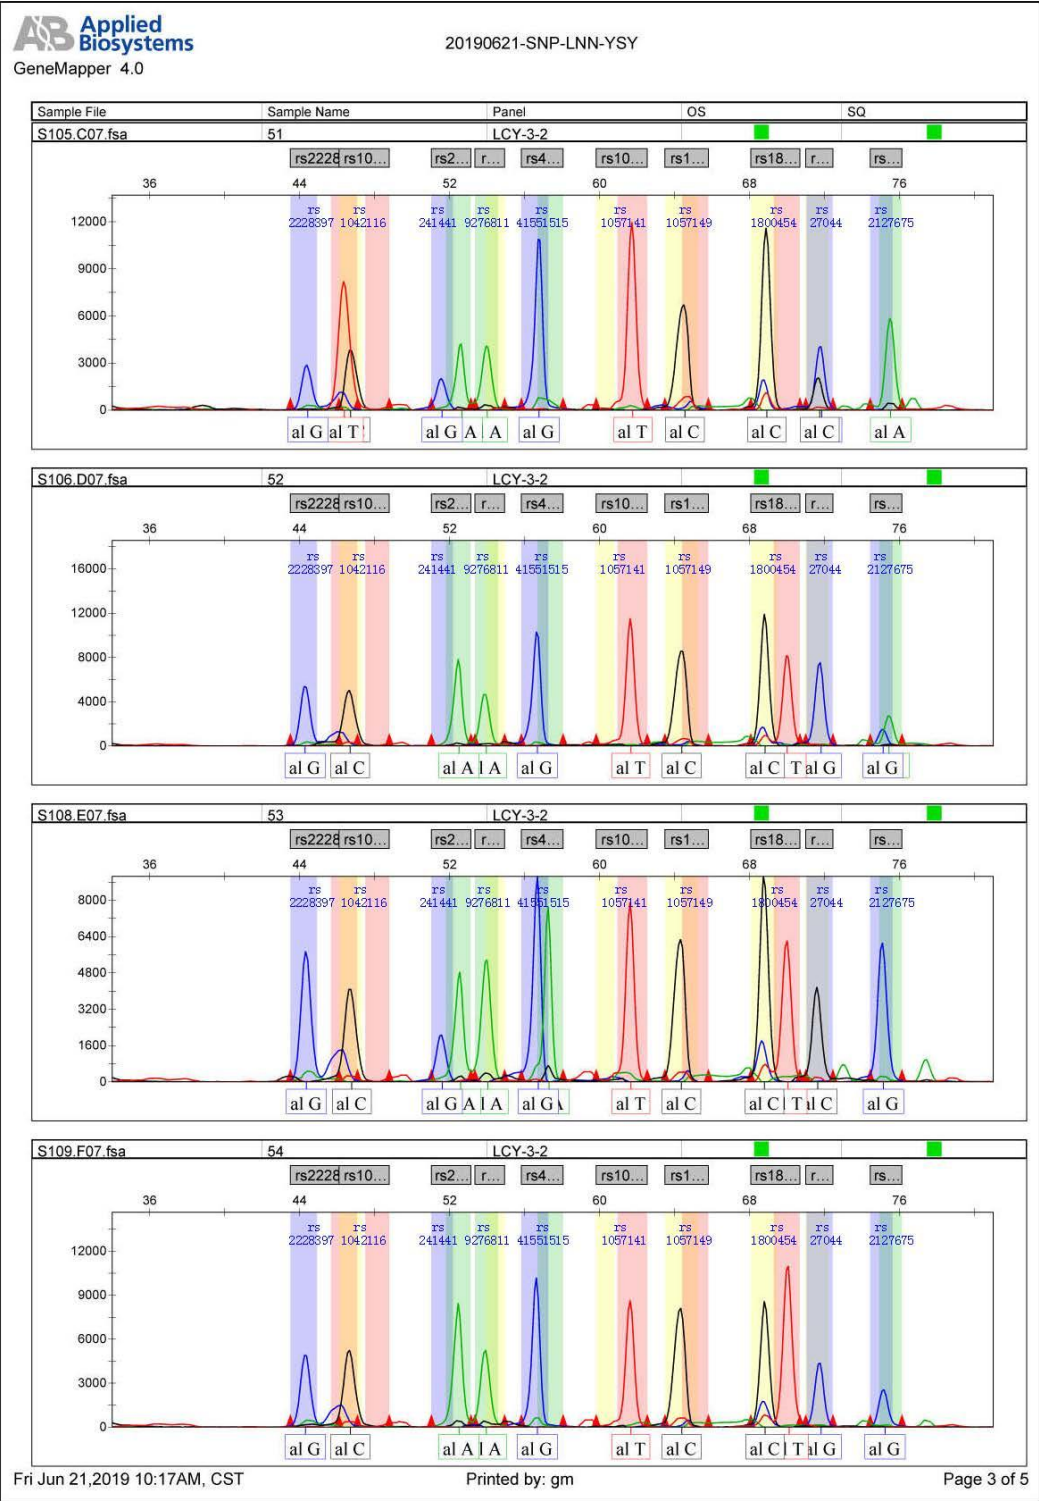

Supplementary Figure 3. The SNaPshot SNP assay group 1 (rs27037, rs3734016, rs2548538, rs2287988, rs1056983)

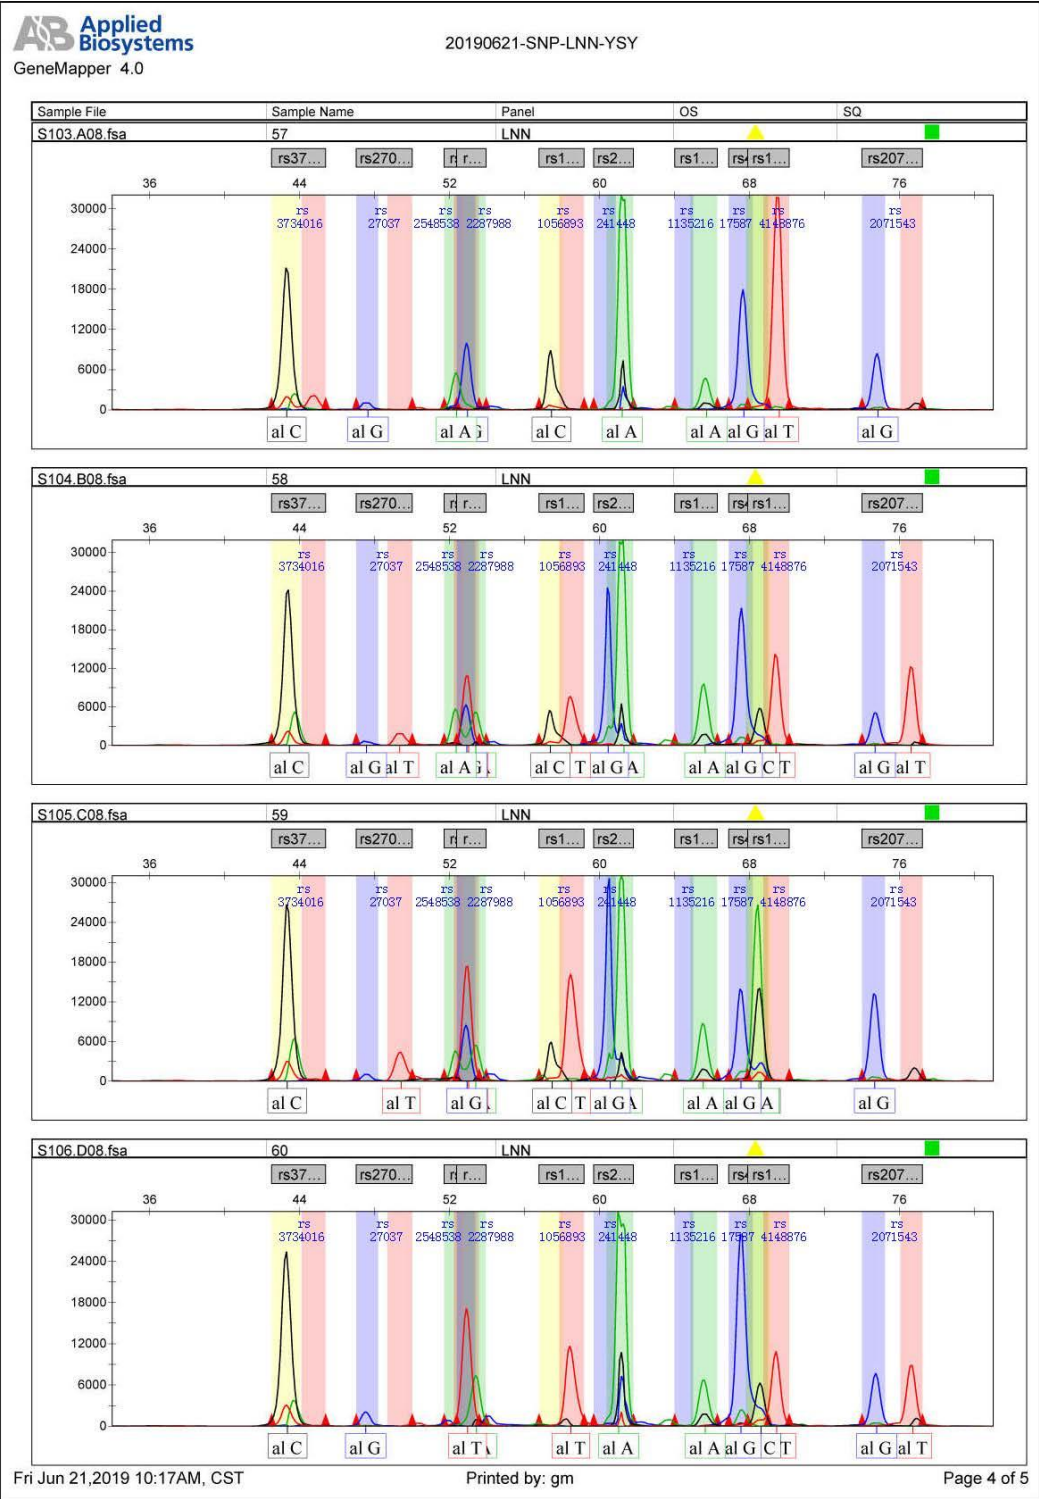

Supplementary Figure 4. The SNP Sequencing map of 11 ERAPs

rs30187:

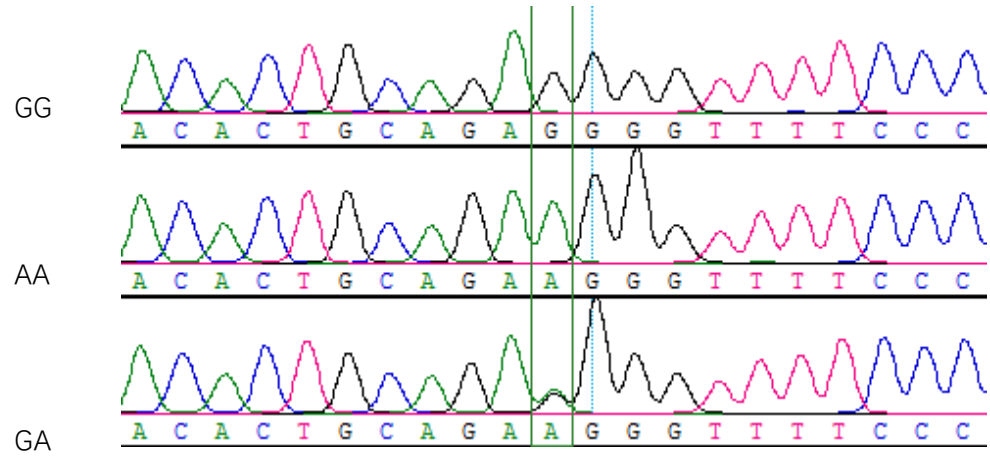

Rs26653:

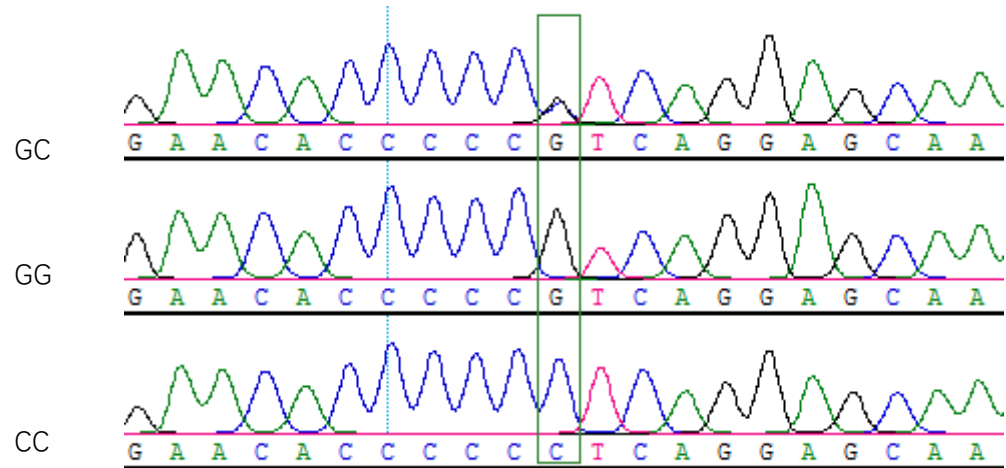

Rs26618:

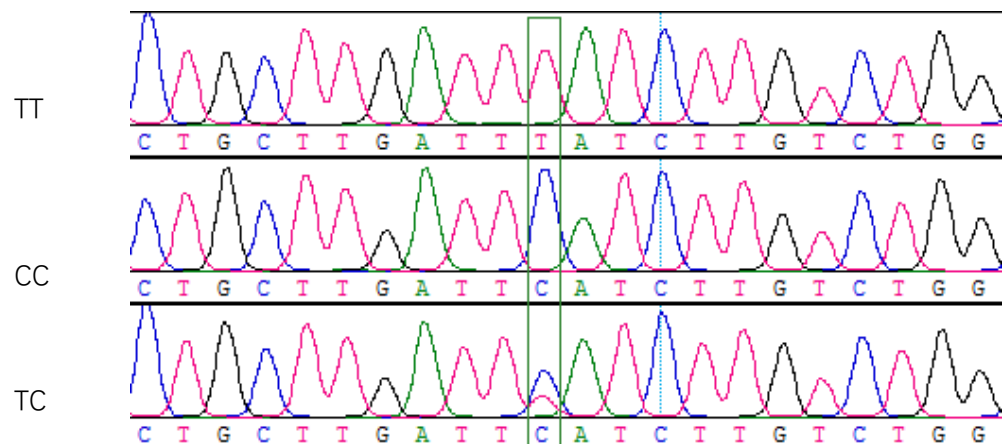

rs2549782:

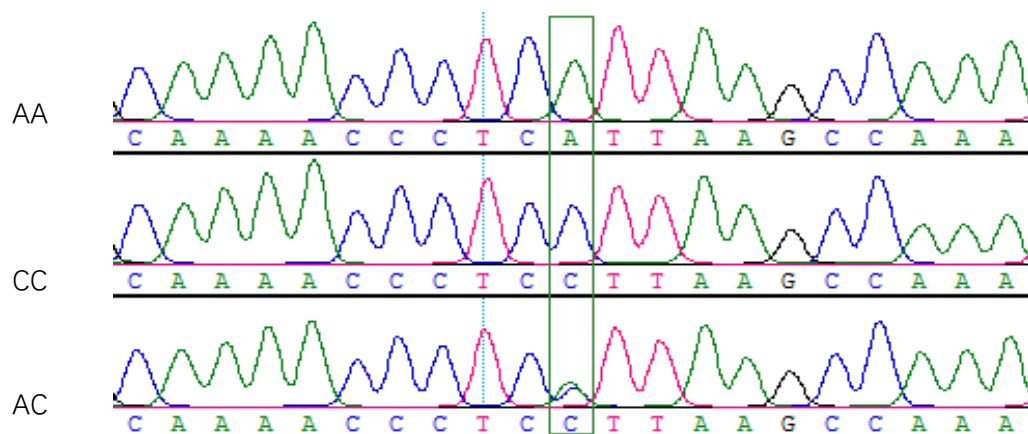

Rs2248374:

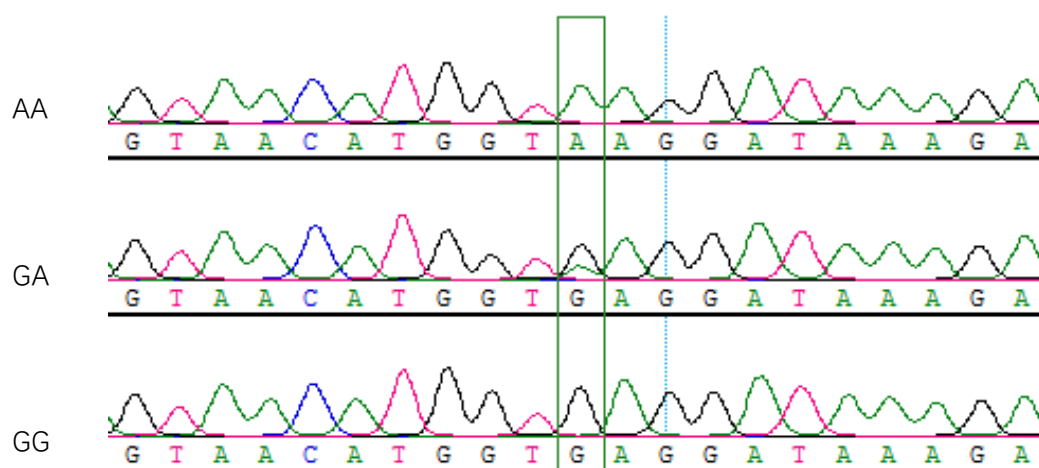

Rs27044:

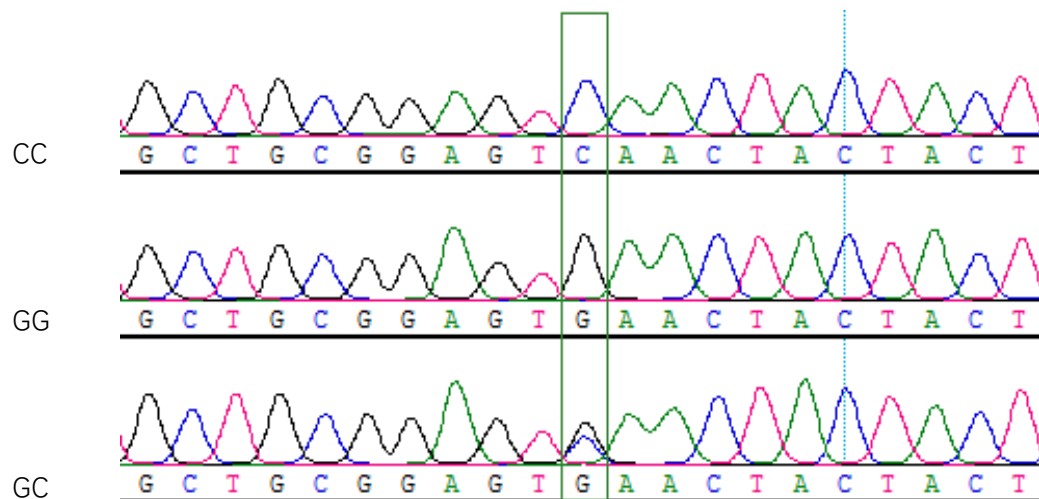



rs3734016

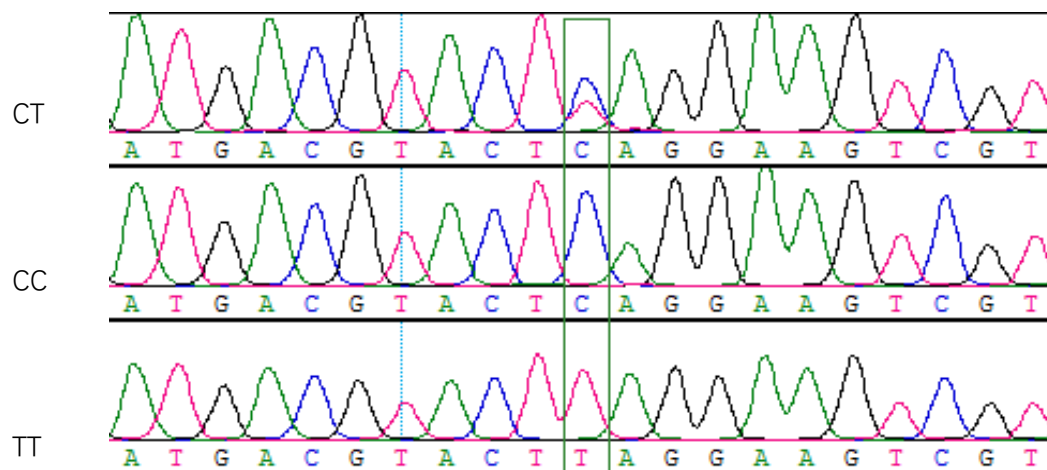

rs27307

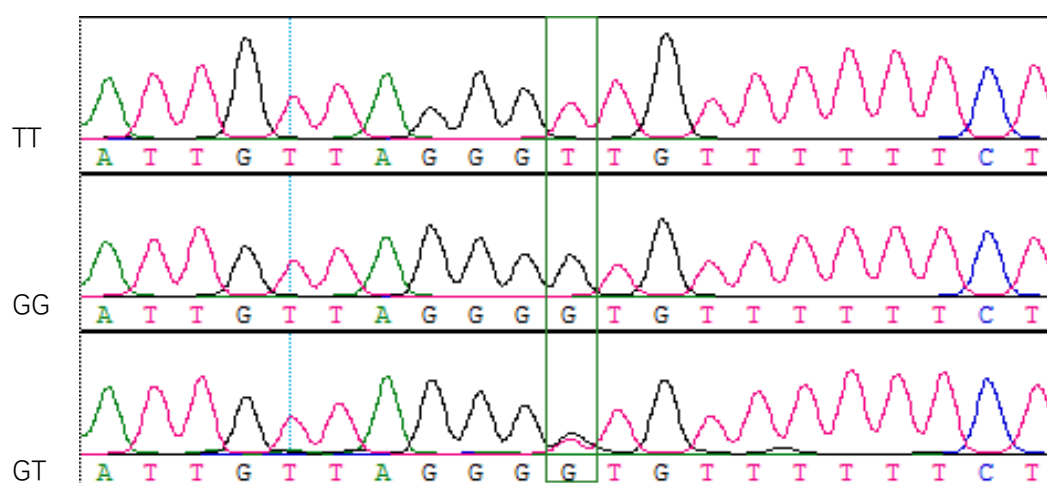

rs2548538:

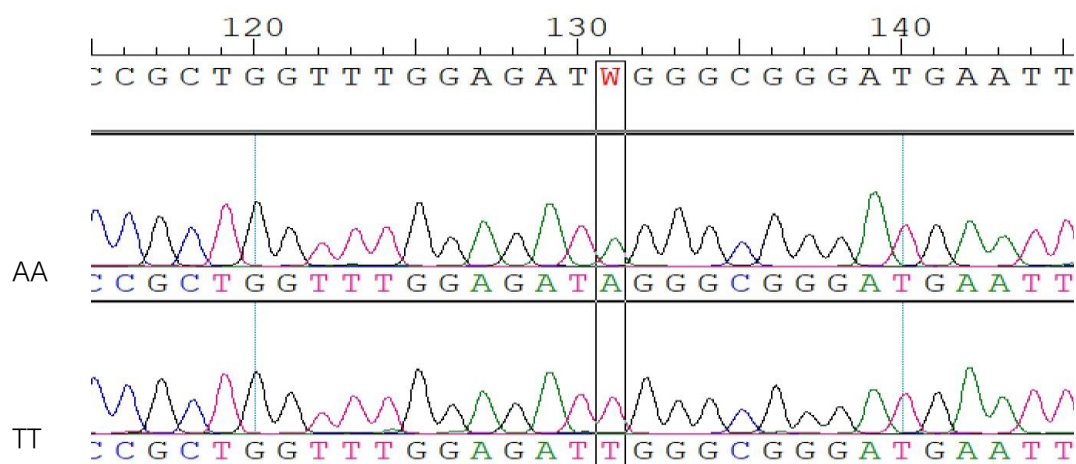

Rs2287988:

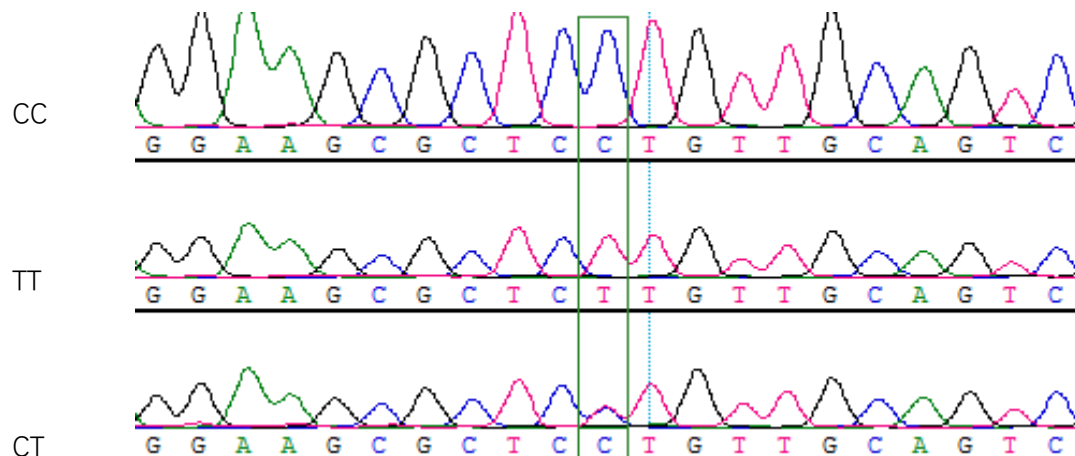

Rs1056893:

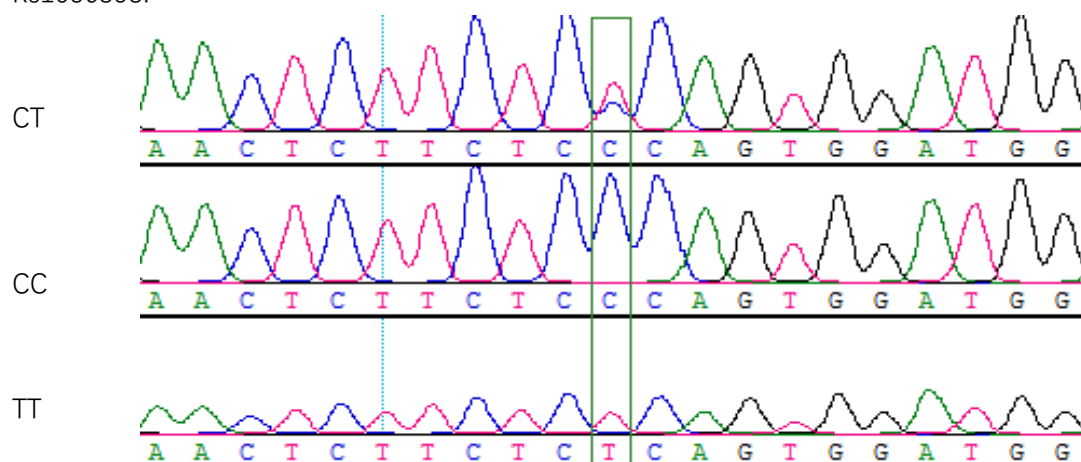

Supplement: Supplementary file [file 25397699]
